# Supplementary material for: Adsorption of rare bases on transition metal doped γ-graphyne nanosheets: a DFT study
Source: Royal Society of Chemistry journal article supplement (doi:10.1039/d4cp03128h), 2024-01-01
Supplement: d4cp03128h2.pdf [file d4cp03128h2.pdf]

## **Adsorption of Rare Bases on Transition Metal Doped $\gamma$ -Graphyne Nanosheets: A DFT study**

Xia Zeng, <sup>a</sup>Ruiying Zhang, <sup>a</sup>Ruirui Li, <sup>a</sup>Ruimei Li, <sup>\*,b</sup>Hong Cui, <sup>c</sup>Caibin Zhao, <sup>a</sup>Shengrui Zhang, <sup>a</sup>LingxiaJin<sup>\*,a</sup>

*<sup>a</sup>Shaanxi Key Laboratory of Catalysis, School of Chemical & Environment Science, Shaanxi University of Technology, Hanzhong 723001*

*<sup>b</sup>School of Mathematics & Computer Science, <sup>c</sup>School of Mechanical Engineering, Shaanxi University of Technology, Hanzhong 723001*

---

\*Corresponding authors. Tel: +86-916-2641660; e-mail: Rae@[snut.edu.cn](mailto:snut.edu.cn) (R.M. Li); e-mail: [jinx@snut.edu.cn](mailto:jinx@snut.edu.cn) (L.X. Jin)

**Table S1** The structural characteristics of TM-GY.

| System  | Fe-GY            | E <sub>ads</sub> /eV | d/Å   | Co-GY            | E <sub>ads</sub> /eV | d/Å   | Ni-GY            | E <sub>ads</sub> /eV | d/Å   |
|---------|------------------|----------------------|-------|------------------|----------------------|-------|------------------|----------------------|-------|
| Cyt     | -PP              | -1.01                | 2.905 | -PP              | -1.08                | 3.241 | -PP              | -0.92                | 3.236 |
|         | -CO              | -1.45                | 2.006 | -CO              | -0.68                | 2.958 | -CO              | -0.73                | 3.055 |
|         | =N               | -1.22                | 2.008 | =N               | -1.24                | 2.220 | =N               | -0.58                | 2.841 |
|         | -NH              | -0.80                | 2.951 | -NH              | -0.84                | 2.166 | -NH              | -0.54                | 2.971 |
|         | -NH <sub>2</sub> | -0.54                | 3.163 | -NH <sub>2</sub> | -0.71                | 3.207 | -NH <sub>2</sub> | -0.54                | 3.133 |
| 5-meCyt | -PP              | -1.14                | 2.882 | -PP              | -1.22                | 3.280 | -PP              | -1.06                | 3.249 |
|         | -CO              | -0.87                | 1.929 | -CO              | -0.72                | 2.957 | -CO              | -0.75                | 3.049 |
|         | =N               | -0.95                | 2.184 | =N               | -1.29                | 2.218 | =N               | -0.73                | 2.171 |
|         | -NH              | -0.88                | 2.955 | -NH              | -0.89                | 2.167 | -NH              | -0.56                | 2.970 |
|         | -NH <sub>2</sub> | -0.60                | 3.160 | -NH <sub>2</sub> | -0.80                | 3.130 | -NH <sub>2</sub> | -0.62                | 3.109 |
| 5-hmCyt | -PP              | -0.57                | 3.038 | -PP              | -1.25                | 3.240 | -PP              | -1.14                | 3.262 |
|         | -CO              | -0.46                | 2.051 | -CO              | -0.71                | 2.906 | -CO              | -0.74                | 3.044 |
|         | =N               | -1.28                | 2.000 | =N               | -1.26                | 2.225 | =N               | -0.55                | 2.960 |
|         | -NH              | -0.66                | 2.673 | -NH              | -0.89                | 2.167 | -NH              | -0.61                | 2.781 |
|         | -NH <sub>2</sub> | -0.64                | 3.108 | -NH <sub>2</sub> | -0.80                | 3.115 | -NH <sub>2</sub> | -0.63                | 3.089 |
| 5-caCyt | -OH              | -0.50                | 2.032 | -OH              | -0.89                | 2.187 | -OH              | -0.57                | 2.965 |
|         | -PP              | -0.36                | 3.035 | -PP              | -1.13                | 3.270 | -PP              | -1.02                | 3.263 |
|         | -CO              | -0.33                | 2.051 | -CO              | -0.66                | 2.968 | -CO              | -0.50                | 2.989 |
|         | =N               | -1.19                | 2.006 | =N               | -1.19                | 2.246 | =N               | -0.69                | 3.104 |
|         | -NH              | -0.03                | 2.721 | -NH              | -0.81                | 2.431 | -NH              | -0.60                | 2.670 |
| 5-fCyt  | -NH <sub>2</sub> | -0.56                | 3.171 | -NH <sub>2</sub> | -0.77                | 3.140 | -NH <sub>2</sub> | -0.59                | 3.131 |
|         | -COOH            | -0.69                | 2.973 | -COOH            | -0.75                | 3.012 | -COOH            | -0.60                | 3.558 |
|         | -PP              | -0.97                | 3.051 | -PP              | -1.14                | 3.250 | -PP              | -0.96                | 3.272 |
|         | -CO              | -0.99                | 2.608 | -CO              | -0.64                | 2.980 | -CO              | -0.48                | 2.990 |
|         | =N               | -1.20                | 1.996 | =N               | -1.28                | 2.224 | =N               | -0.78                | 2.989 |
| 5-fCyt  | -NH              | -0.02                | 2.719 | -NH              | -1.24                | 2.090 | -NH              | -0.56                | 2.730 |
|         | -NH <sub>2</sub> | -0.55                | 3.150 | -NH <sub>2</sub> | -0.73                | 3.150 | -NH <sub>2</sub> | -0.56                | 3.129 |
|         | -CHO             | -1.13                | 2.018 | -CHO             | -0.70                | 3.011 | -CHO             | -0.49                | 2.992 |

**Table S2** Abbreviations and Corresponding terminology

| Abbreviations | Corresponding terminology                 |
|---------------|-------------------------------------------|
| RBs           | Rare Bases                                |
| $\gamma$ -G   | $\gamma$ -Graphyne                        |
| TM-GY         | Transition metal-doped $\gamma$ -graphyne |
| Cyt           | Cytosine                                  |
| 5-meCyt       | 5-methylcytosine                          |
| 5-hmCyt       | 5-hydroxymethylcytosine                   |
| 5-caCyt       | 5-carboxycytosine                         |
| 5-fCyt        | 5-formylcytosine                          |
| 2D            | Two-dimensional                           |
| GDY           | Graphiyne                                 |
| GDYNP         | Graphiyne-based nanopore                  |
| PDOS          | Partial density of states                 |
| CDD           | Charge differential density               |
| DFT           | Density functional theory                 |
| GGA           | Generalized gradient approximation        |
| PBE           | Perdew-Burke-Ernzerhof                    |
| DNP           | Polarized double numerical                |
| BSSE          | Basis Set Superposition Error             |
| XRD           | X-ray Diffraction                         |
| STM           | Scanning tunnel microscope                |
| ESP           | Electrostatic potential isosurface        |

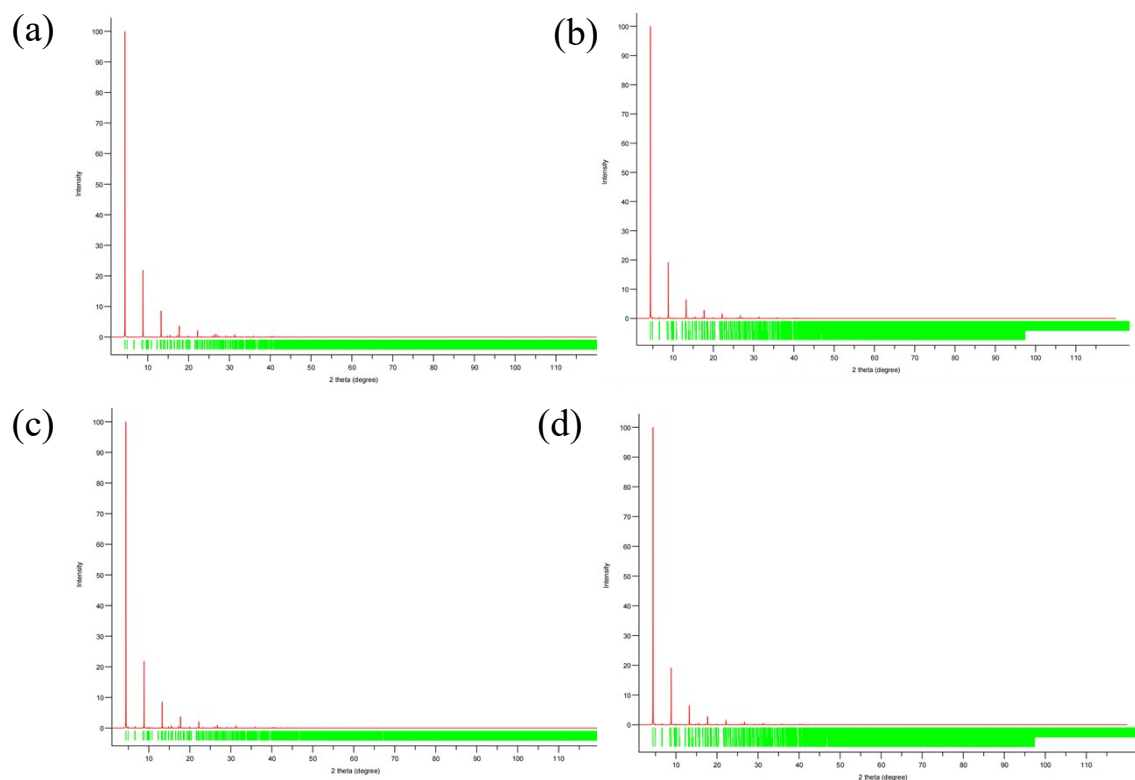

**Fig. S1** The XRD of (a)  $\gamma$ -GY, (b) Fe-GY, (c) Co-GY, and (d) Ni-GY.

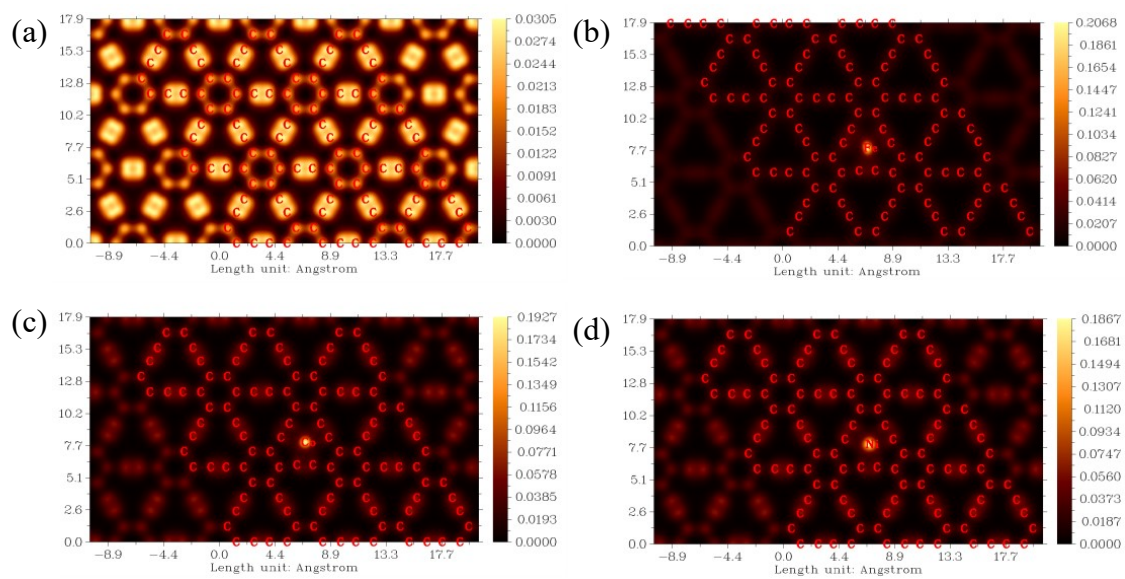

**Fig. S2** The STM of (a)  $\gamma$ -GY, (b) Fe-GY, (c) Co-GY, and (d) Ni-GY.

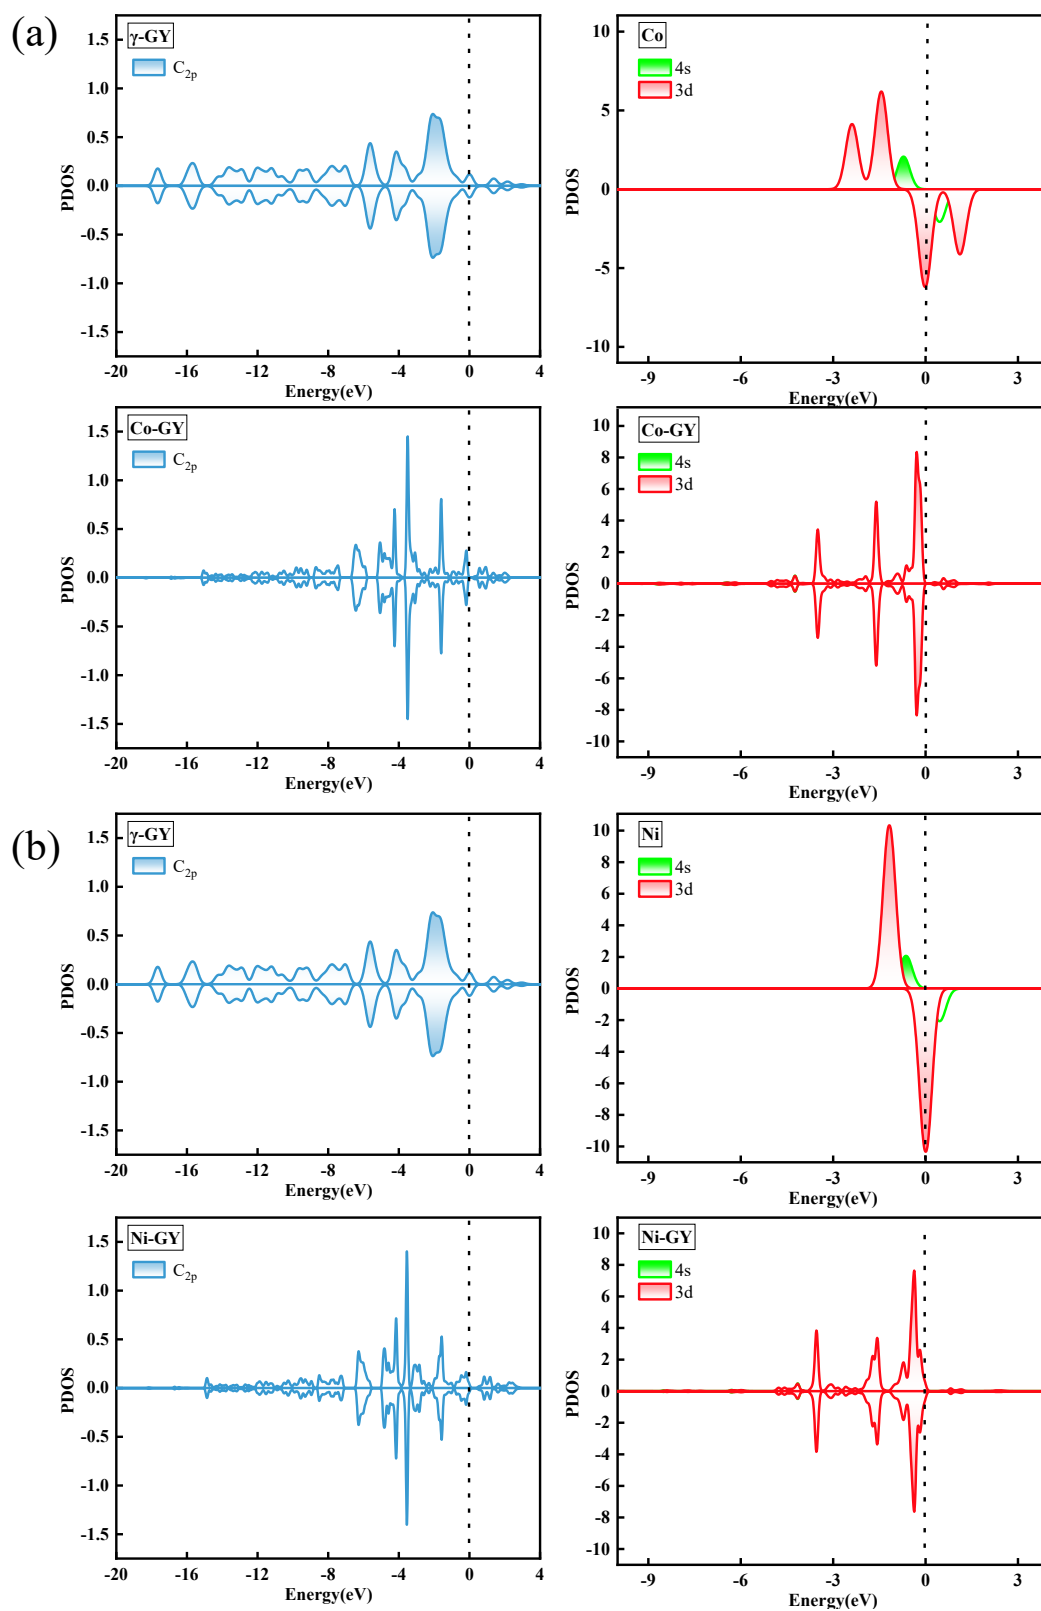

**Fig. S3** PDOS plots: (a) the comparison of the  $C_{2p}$  orbitals between  $\gamma$ -GY and Co-GY in the left panel, the comparison of the Co valence orbitals of the standalone Co atom with those within the Co-GY system in the right panel, (b) the comparison of the  $C_{2p}$  orbitals between  $\gamma$ -GY and Ni-GY in the left panel, the comparison of the Ni valence orbitals of the standalone Ni atom with those within the Ni-GY system in the right panel.

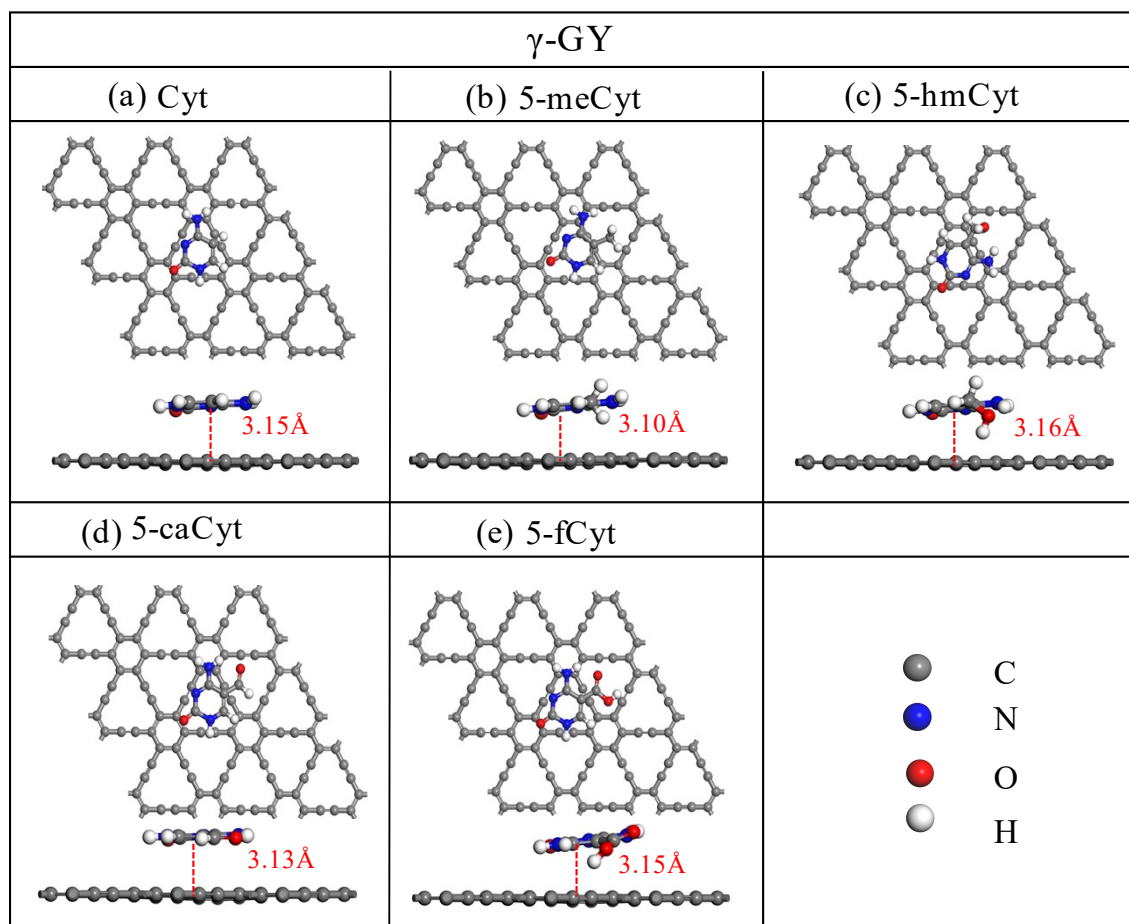

**Fig. S4** Optimized geometries of (a) Cyt, (b) 5-meCyt, (c) 5-hmCyt, (d) 5-caCyt, and (e) 5-fCyt adsorbed on  $\gamma$ -GY system ( top and side perspective ).

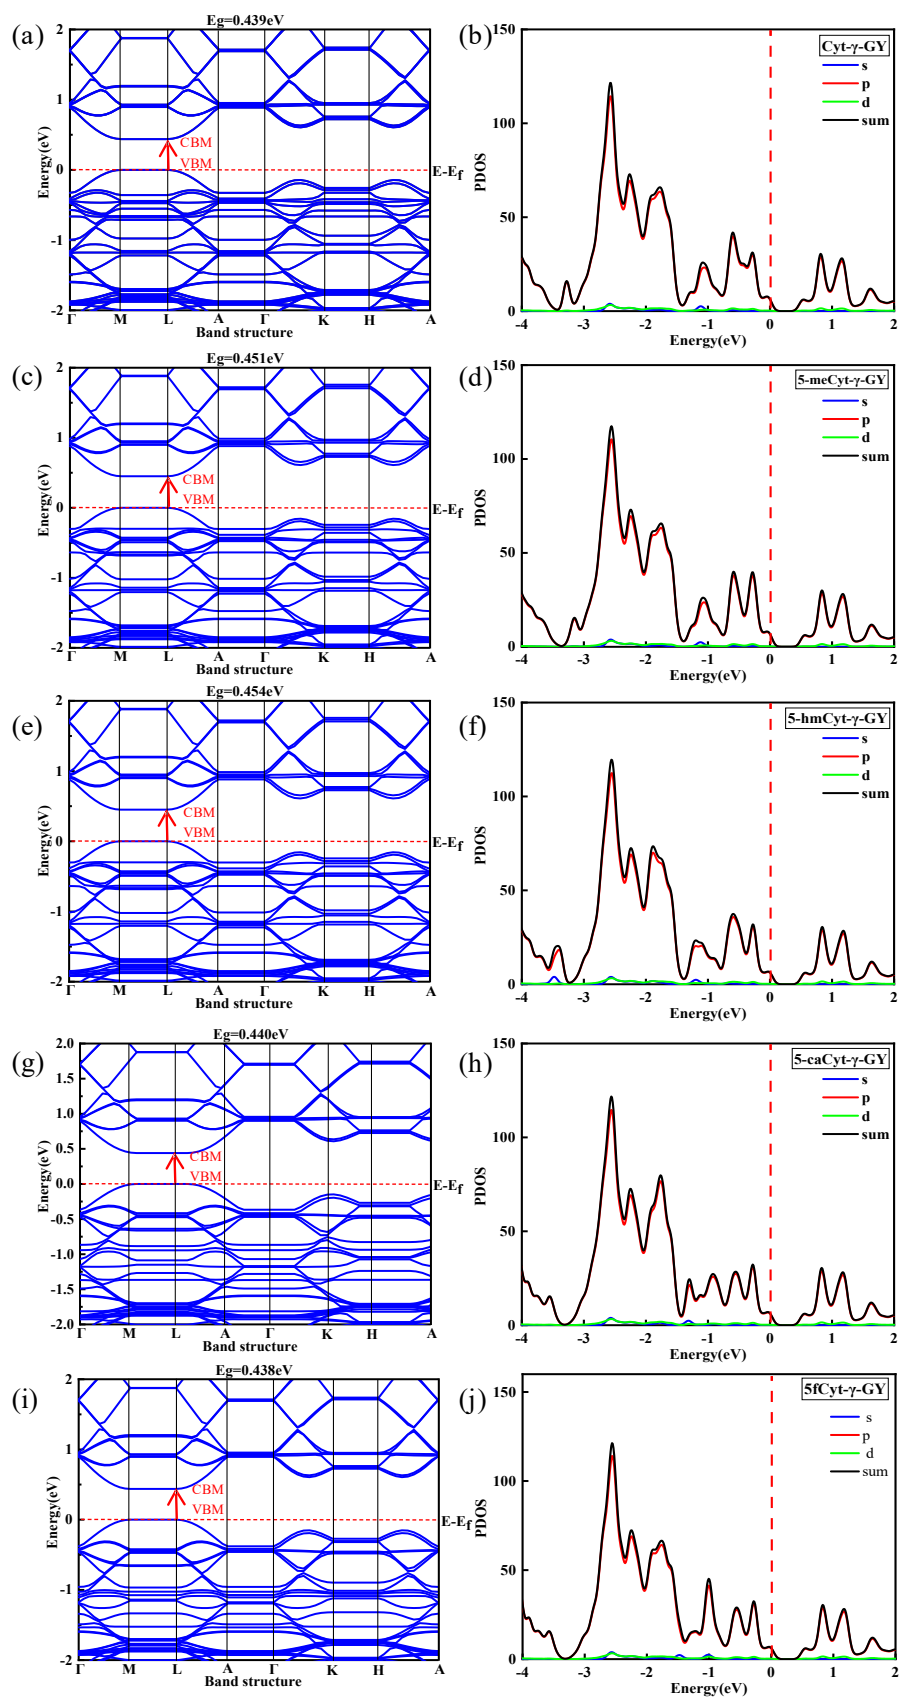

**Fig. S5** Band structure ( the left ) of (a) Cyt, (c) 5-meCyt, (e) 5-hmCyt, (g) 5-caCyt and (i) 5-fCyt absorbed on  $\gamma$ -GY nanosheets, DOS plot ( the right ) of (b) Cyt, (d) 5-meCyt, (f) 5-hmCyt, (h) 5-caCyt and (j) 5-fCyt absorbed on  $\gamma$ -GY nanosheets. The Fermi level is set to zero.

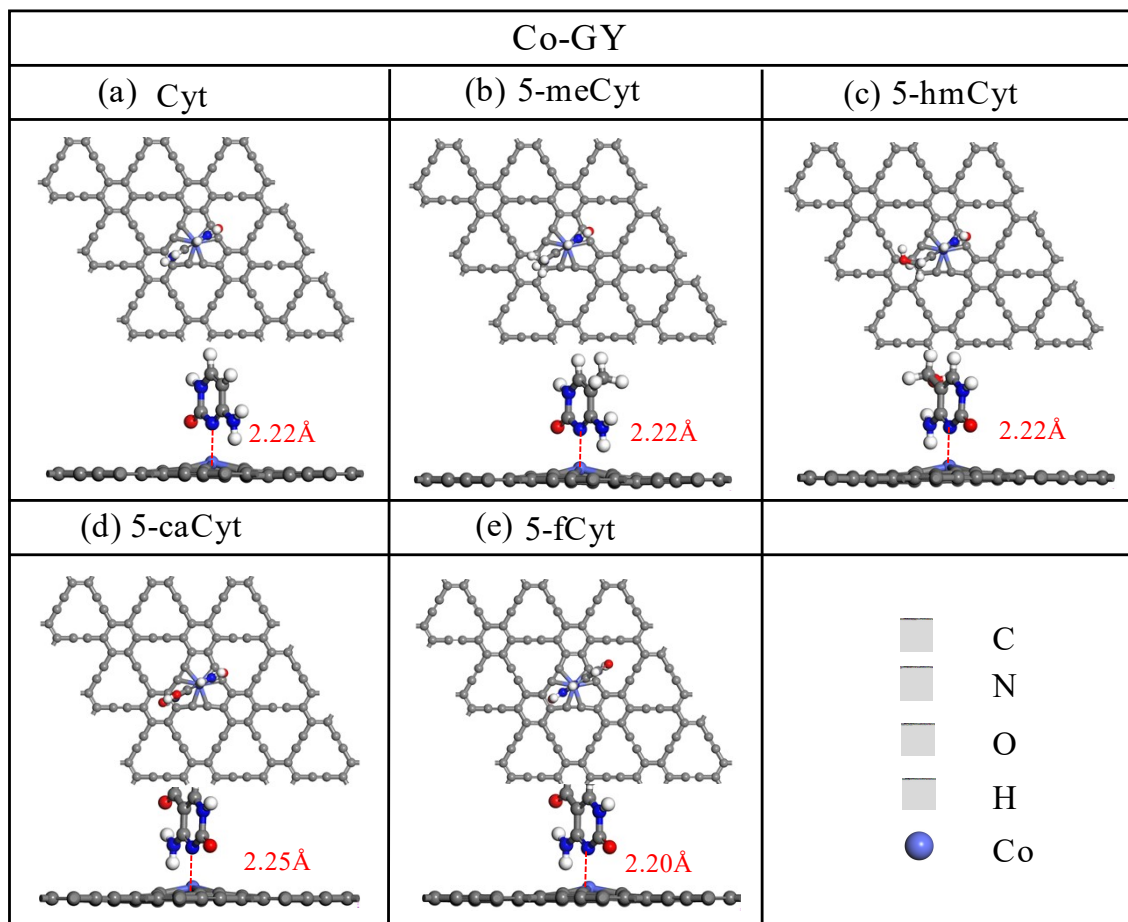

**Fig. S6** Optimized geometries of (a) Cyt, (b) 5-meCyt, (c) 5-hmCyt, (d) 5-caCyt, and (e) 5-fCyt adsorbed on Co-GY system ( top and side perspective ).



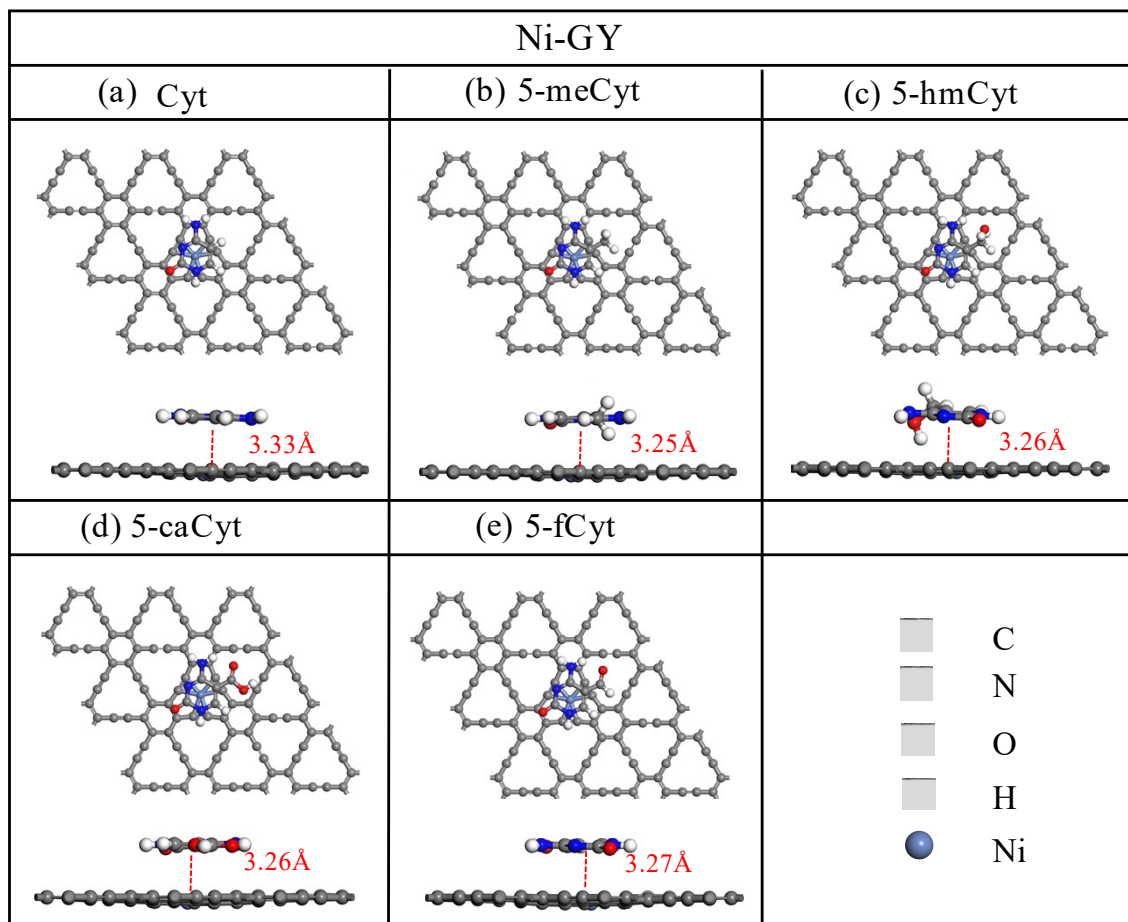

**Fig. S7** Optimized geometries of (a) Cyt, (b) 5-meCyt, (c) 5-hmCyt, (d) 5-caCyt, and (e) 5-fCyt absorbed on Fe-GY system ( top and side perspective ).

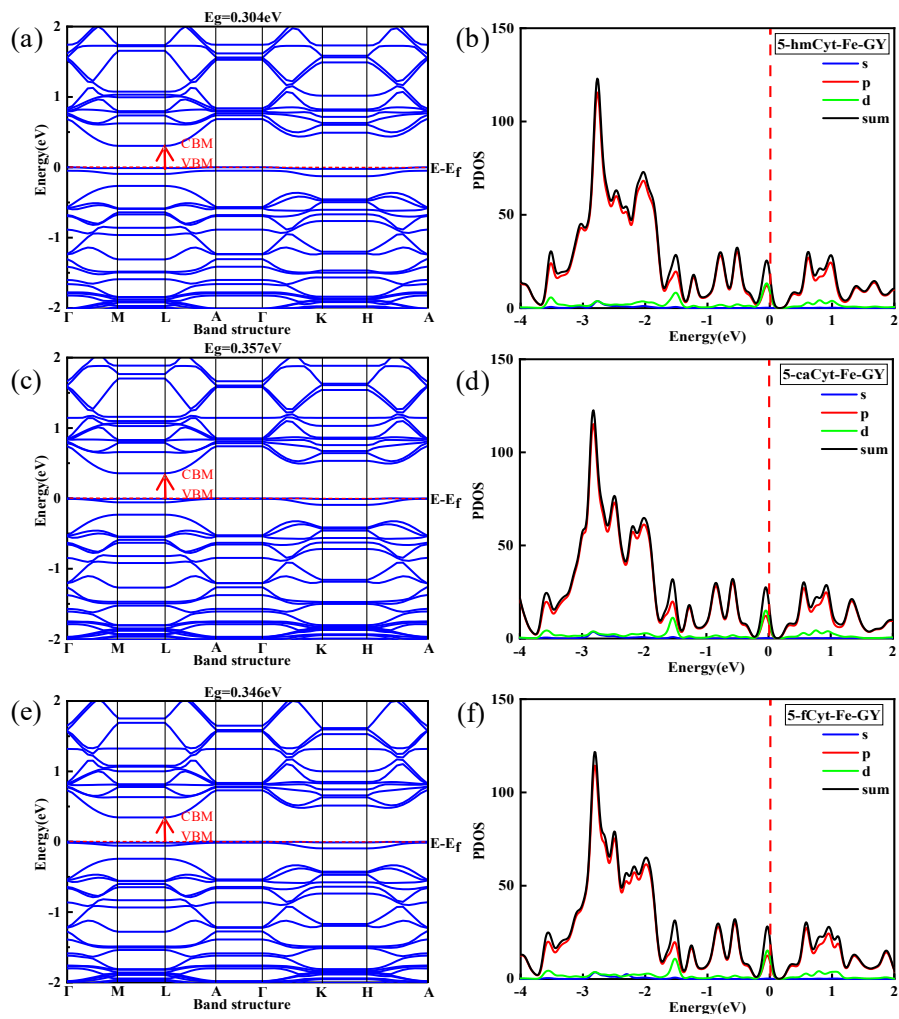

**Fig.S8** Band structure ( the left ) of (a) 5-hmCyt, (c) 5-caCyt and (e) 5-fCyt absorbed on Fe-GY nanosheets, DOS plot (the right) of (b) 5-hmCyt, (d) 5-caCyt and (f) 5-fCyt absorbed on Fe-GY nanosheets. The Fermi level is set to zero.

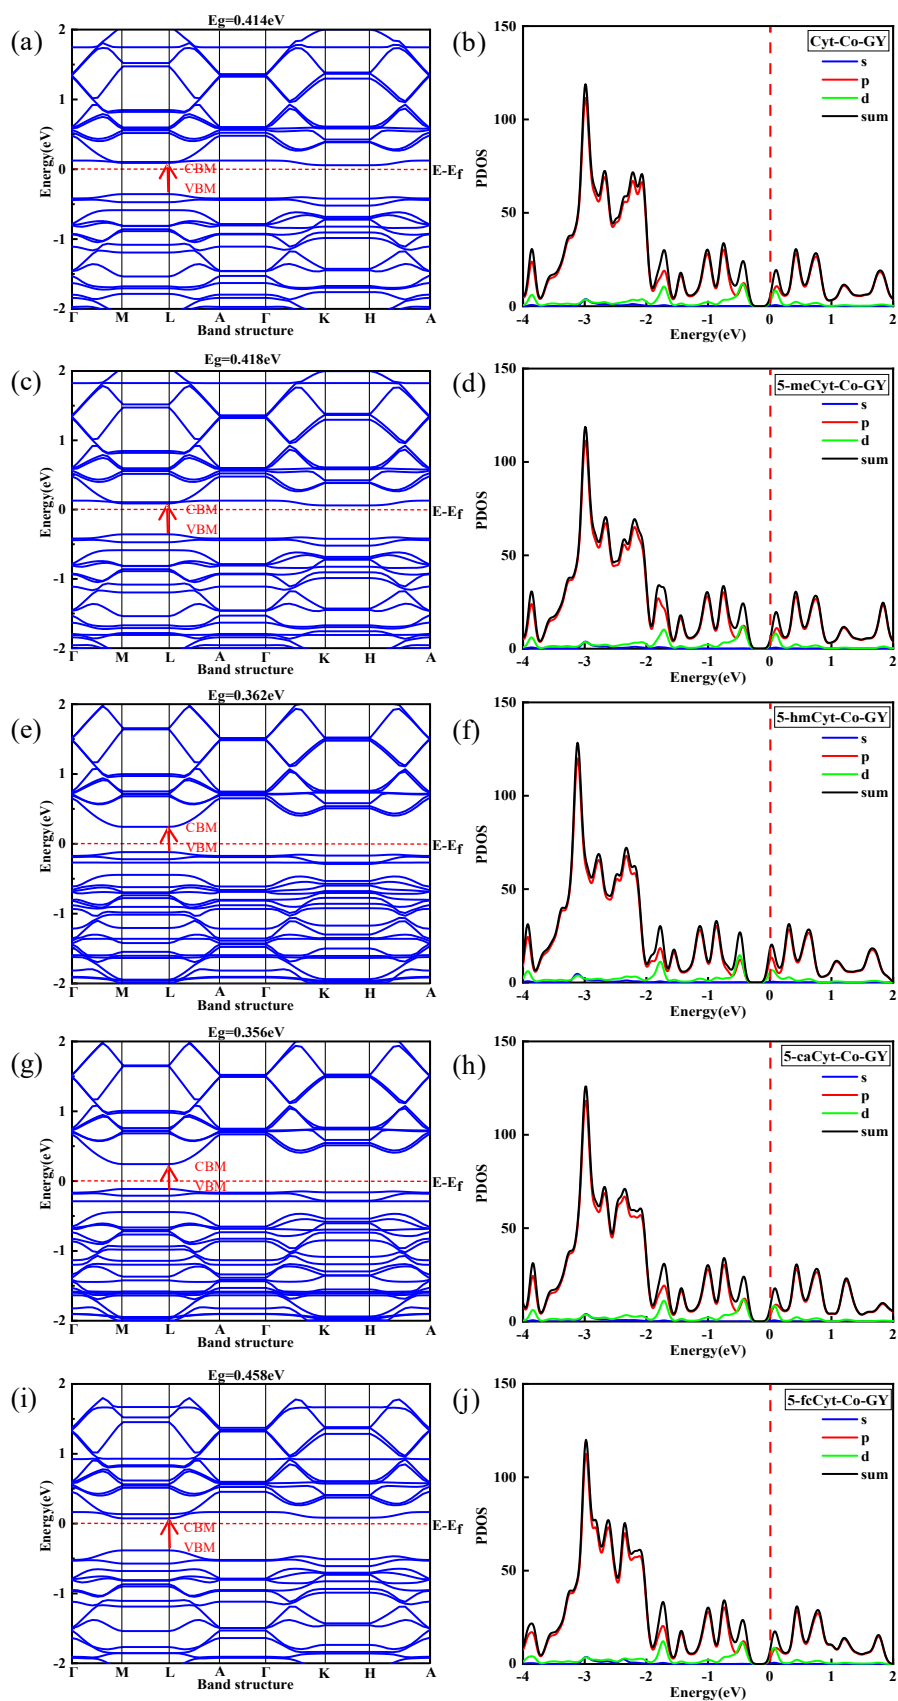

**Fig. S9** Band structure ( the left ) of (a) Cyt, (c) 5-meCyt, (e) 5-hmCyt, (g) 5-caCyt and (i) 5-fCyt absorbed on Co-GY nanosheets, DOS plot( the right ) of (b) Cyt, (d) 5-meCyt, (f) 5-hmCyt, (h) 5-caCyt and (j) 5-fCyt absorbed on Co-GY nanosheets. The Fermi level is set to zero.

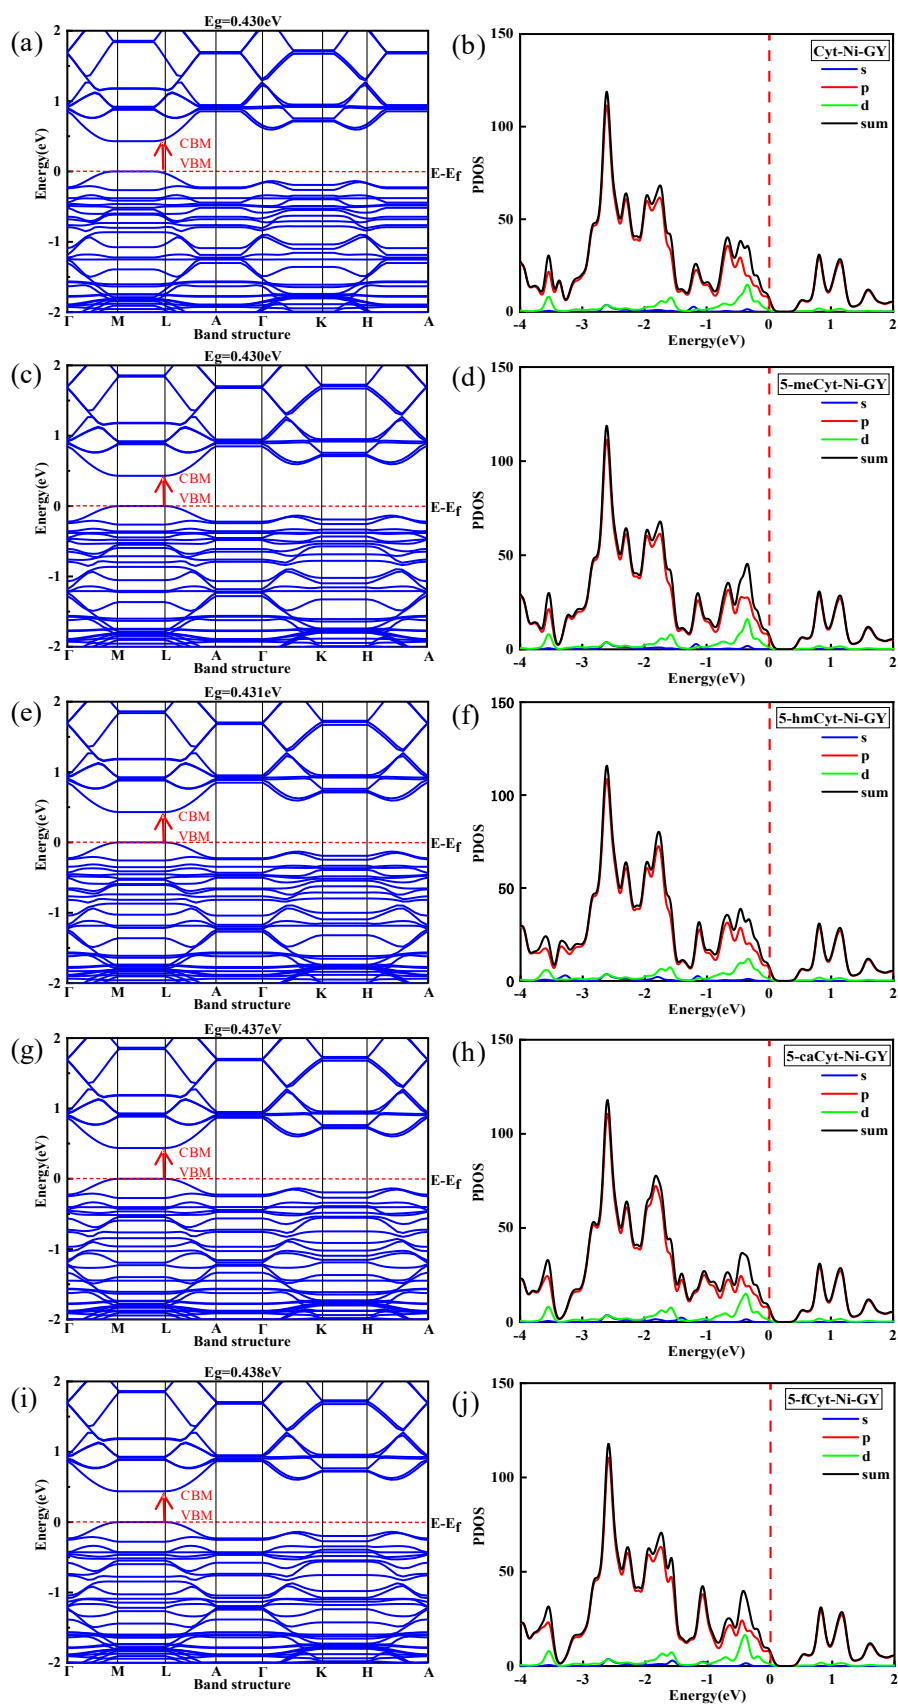

**Fig. S10** Band structure ( the left ) of (a) Cyt, (c) 5-meCyt, (e) 5-hmCyt, (g) 5-caCyt and (i) 5-fCyt absorbed on Ni-GY nanosheets, DOS plot ( the right ) of (b) Cyt, (d) 5-meCyt, (f) 5-hmCyt, (h) 5-caCyt and (j) 5-fCyt absorbed on Ni-GY nanosheets. The Fermi level is set to zero.

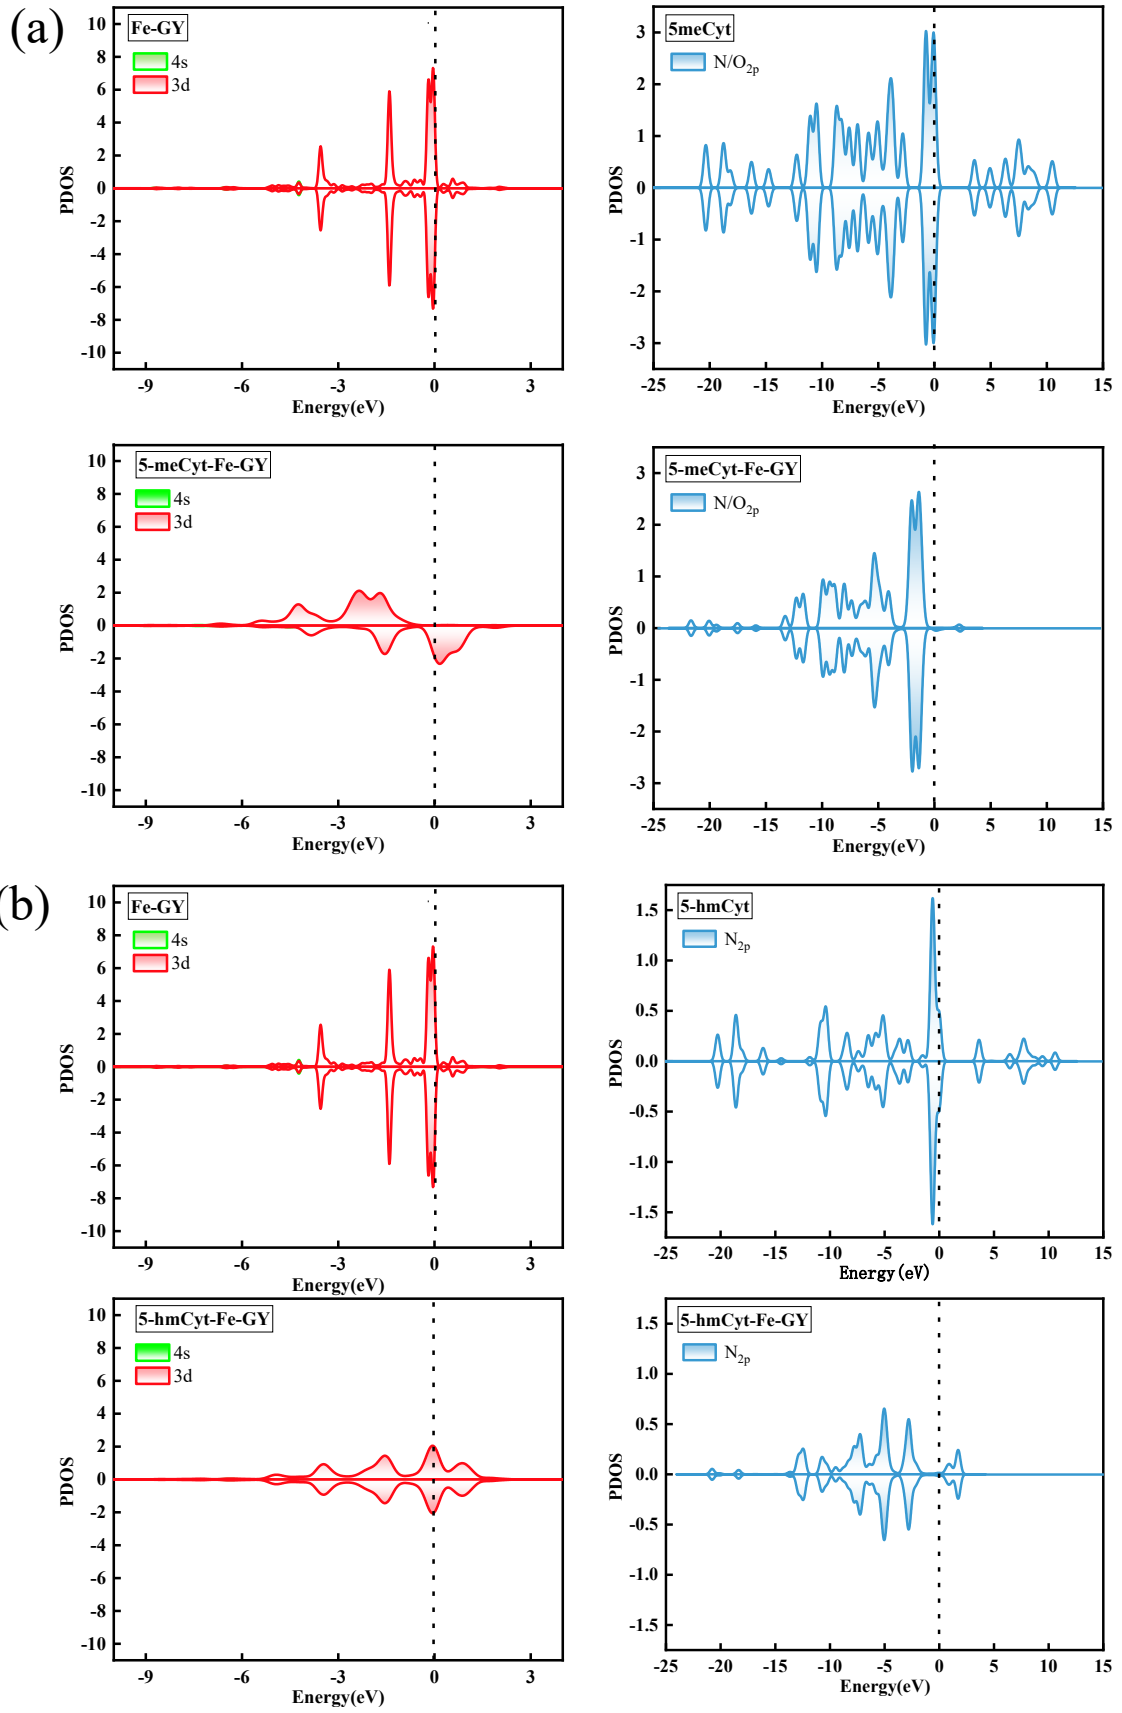

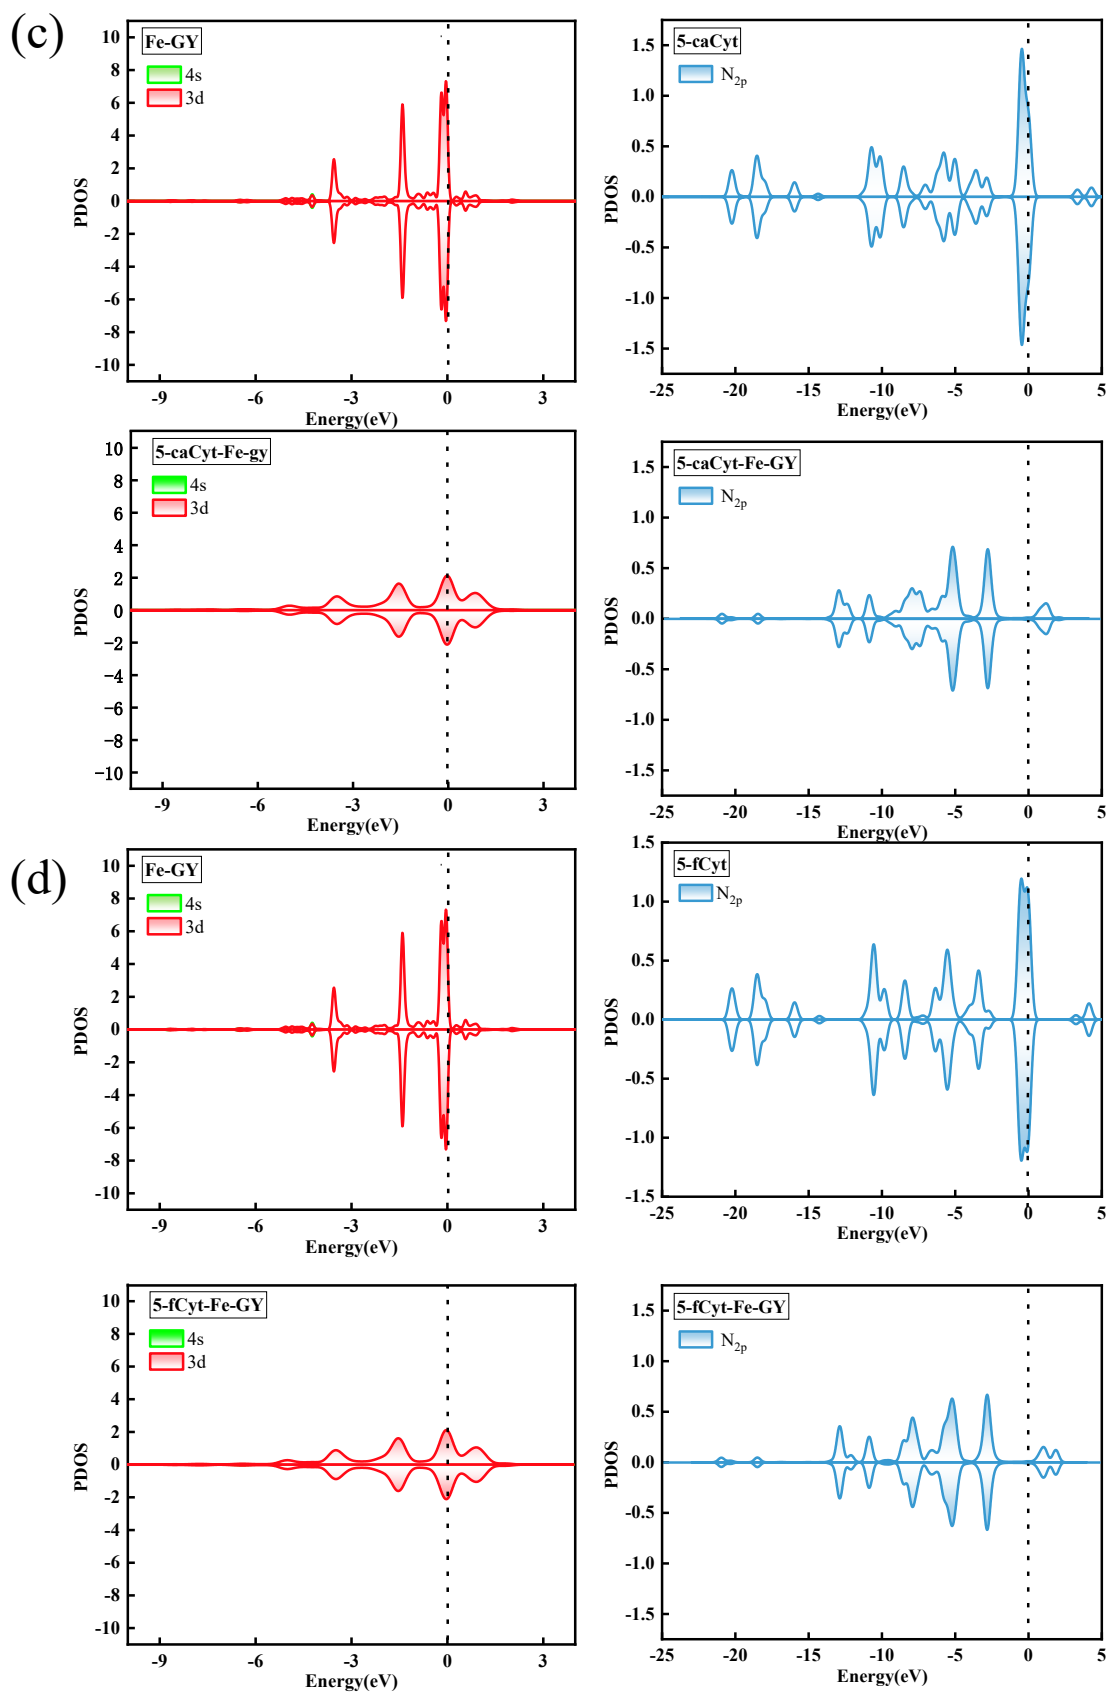

**Fig. S11** PDOS plots: (a) the comparison of the Fe valence orbitals between Fe-GY and 5-meCyt-Fe-GY in the left panel, the comparison of the  $O_{2p}/N_{2p}$  of the standalone 5-meCyt with those within the 5-meCyt-Fe-GY system in the right panel; (b) the comparison of the Fe valence orbitals between Fe-GY and 5-hmCyt-Fe-GY in the left panel,

the comparison of the  $N_{2p}$  of the standalone 5-hmCyt with those within the 5-hmCyt-Fe-GY system in the right panel; (c) the comparison of the Fe valence orbitals between Fe-GY and 5-caCyt-Fe-GY in the left panel, the comparison of the  $N_{2p}$  of the standalone 5-caCyt with those within the 5-caCyt-Fe-GY system in the right panel; (d) the comparison of the Fe valence orbitals between Fe-GY and 5-fCyt-Fe-GY in the left panel, the comparison of the  $N_{2p}$  of the standalone 5-fCyt with those within the 5-fCyt-Fe-GY system in the right panel.

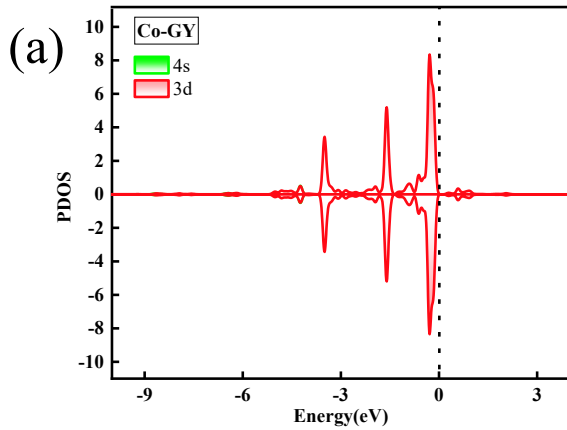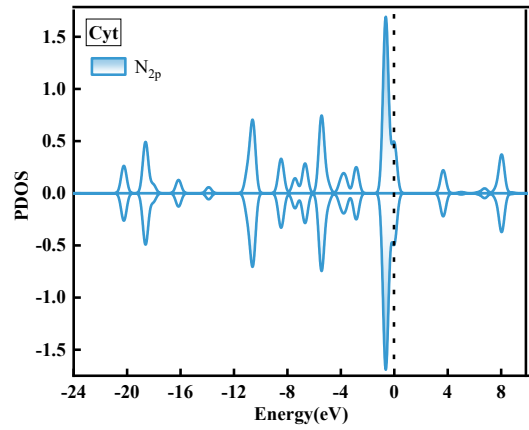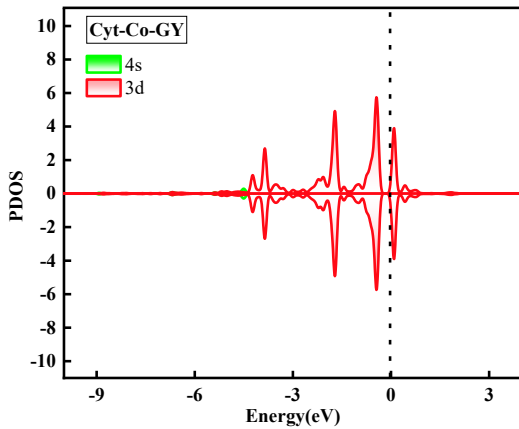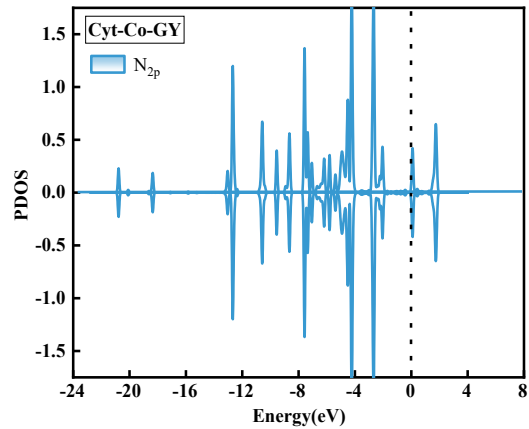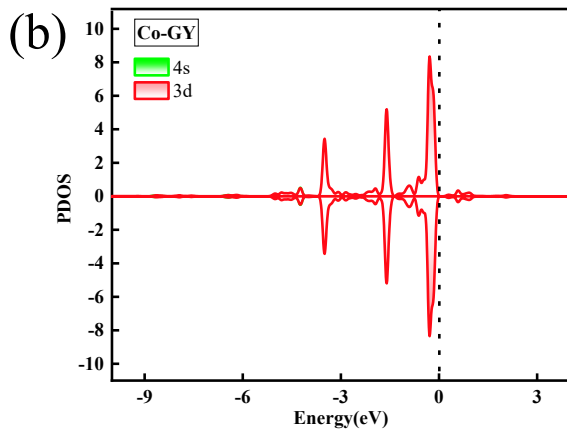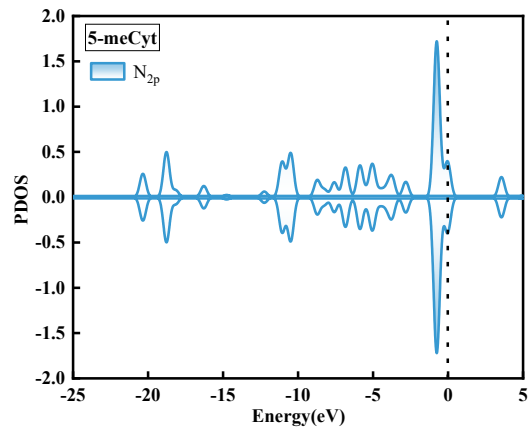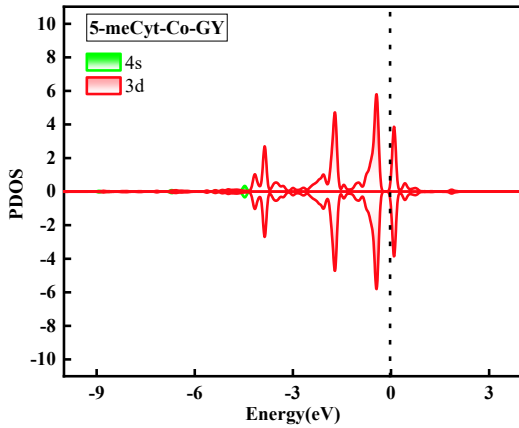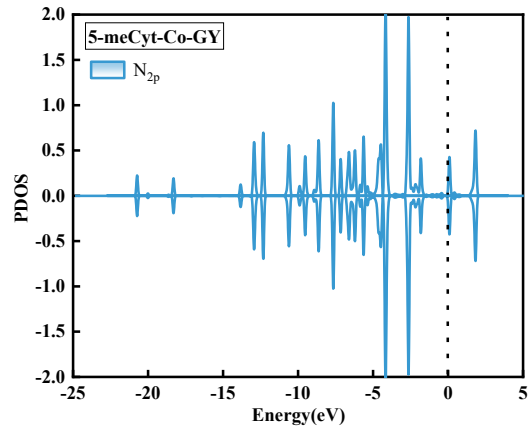



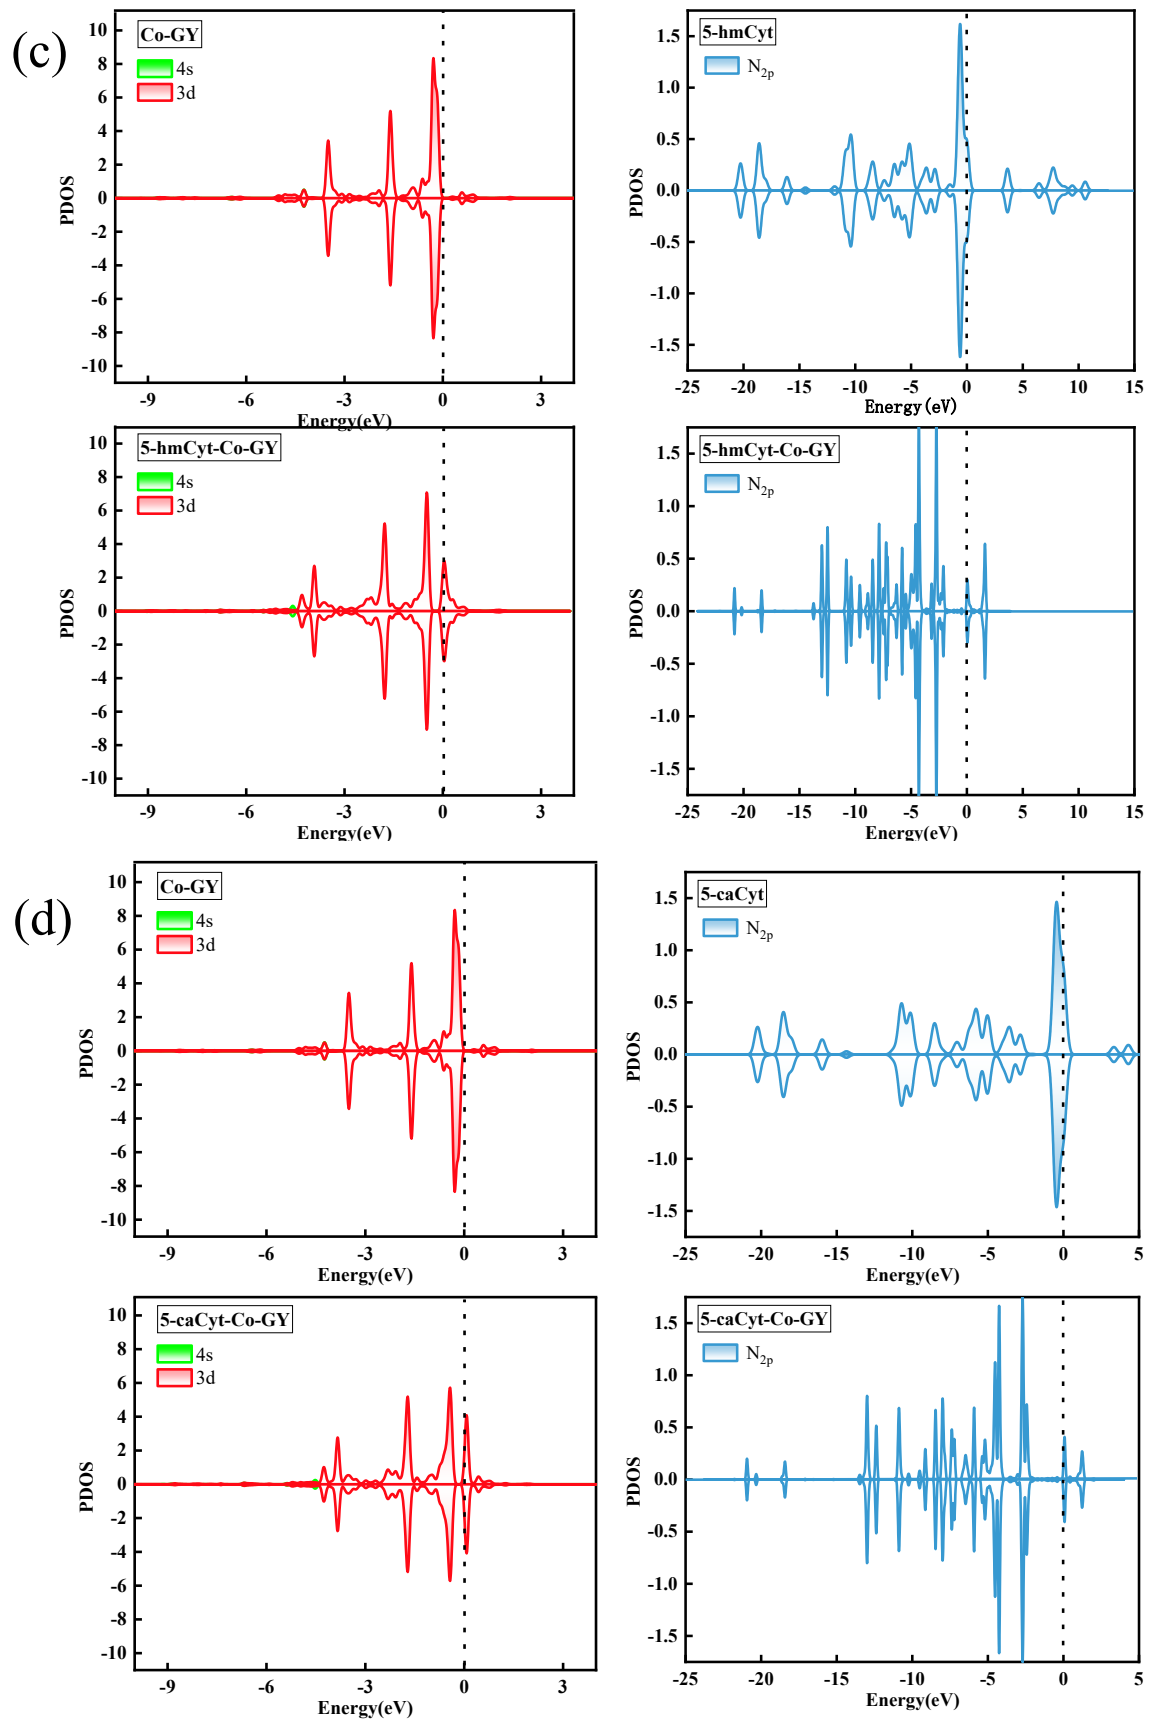

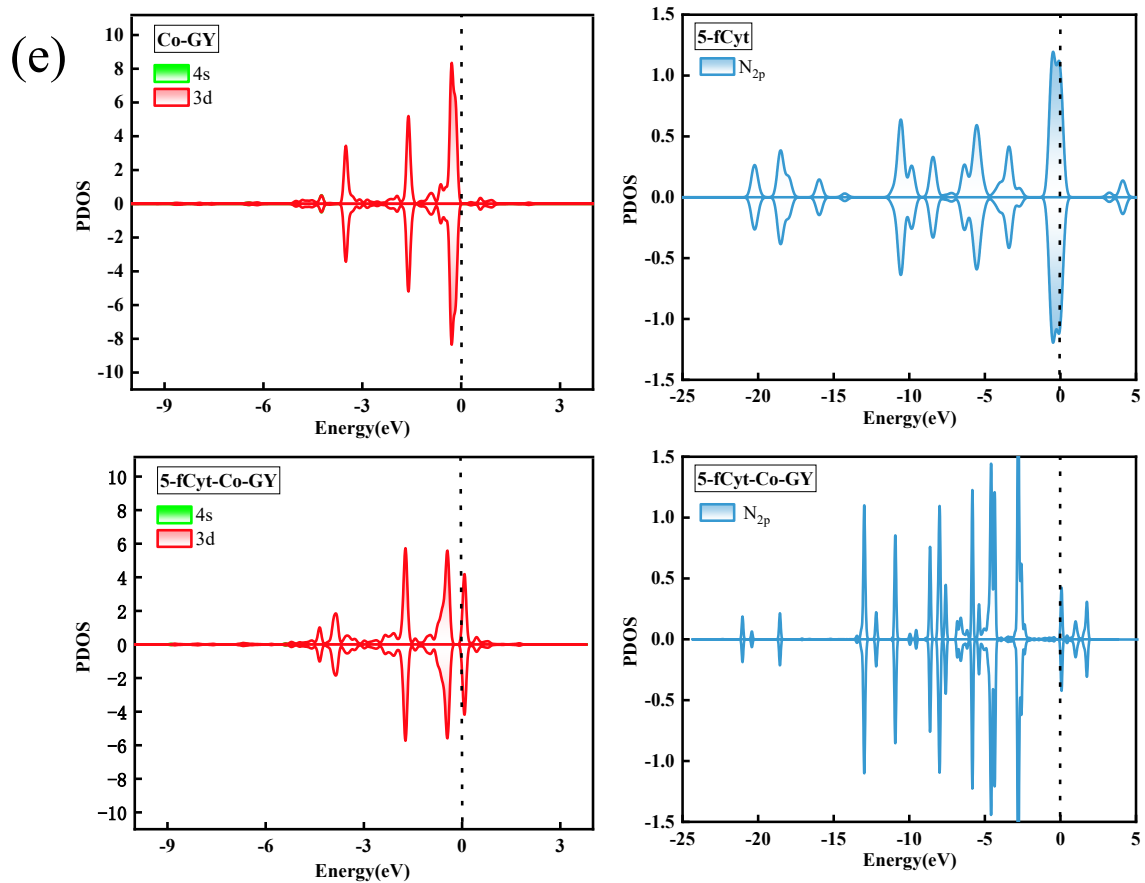

**Fig. S12** PDOS plots: (a) the comparison of the Co valence orbitals between Co-GY and Cyt-Co-GY in the left panel, the comparison of the  $O_{2p}/N_{2p}$  of the standalone Cyt with those within the Cyt-Co-GY system in the right panel; (b) the comparison of the Co valence orbitals between Co-GY and 5-meCyt-Co-GY in the left panel, the comparison of the  $O_{2p}/N_{2p}$  of the standalone 5-meCyt with those within the 5-meCyt-Co-GY system in the right panel; (c) the comparison of the Co valence orbitals between Co-GY and 5-hmCyt-Co-GY in the left panel, the comparison of the  $O_{2p}/N_{2p}$  of the standalone 5-hmCyt with those within the 5-hmCyt-Co-GY system in the right panel; (d) the comparison of the Co valence orbitals between Co-GY and 5-caCyt-Co-GY in the left panel, the comparison of the  $O_{2p}/N_{2p}$  of the standalone 5-caCyt with those within the 5-caCyt-Co-GY system in the right panel; (e) the comparison of the Co valence orbitals between Co-GY and 5-fCyt-Co-GY in the left panel, the comparison of the  $O_{2p}/N_{2p}$  of the standalone 5-fCyt with those within the 5-fCyt-Co-GY system in the right panel.

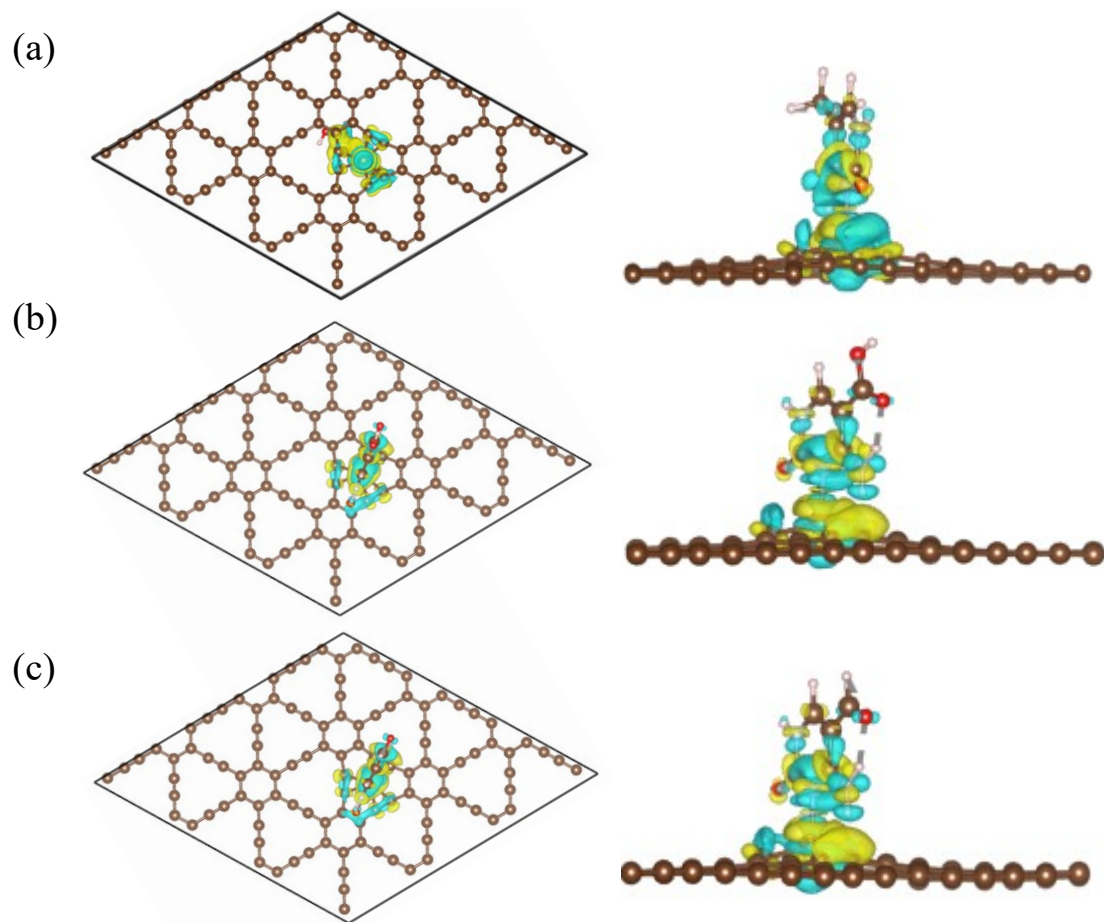

**Fig. S13** The CDD of (a) 5-hmCyt-Fe-GY, (b) 5-caCyt-Fe-GY, (c) 5-fCyt-Fe-GY (top and side view). The yellow and blue are the charge accumulation and depletion, respectively.

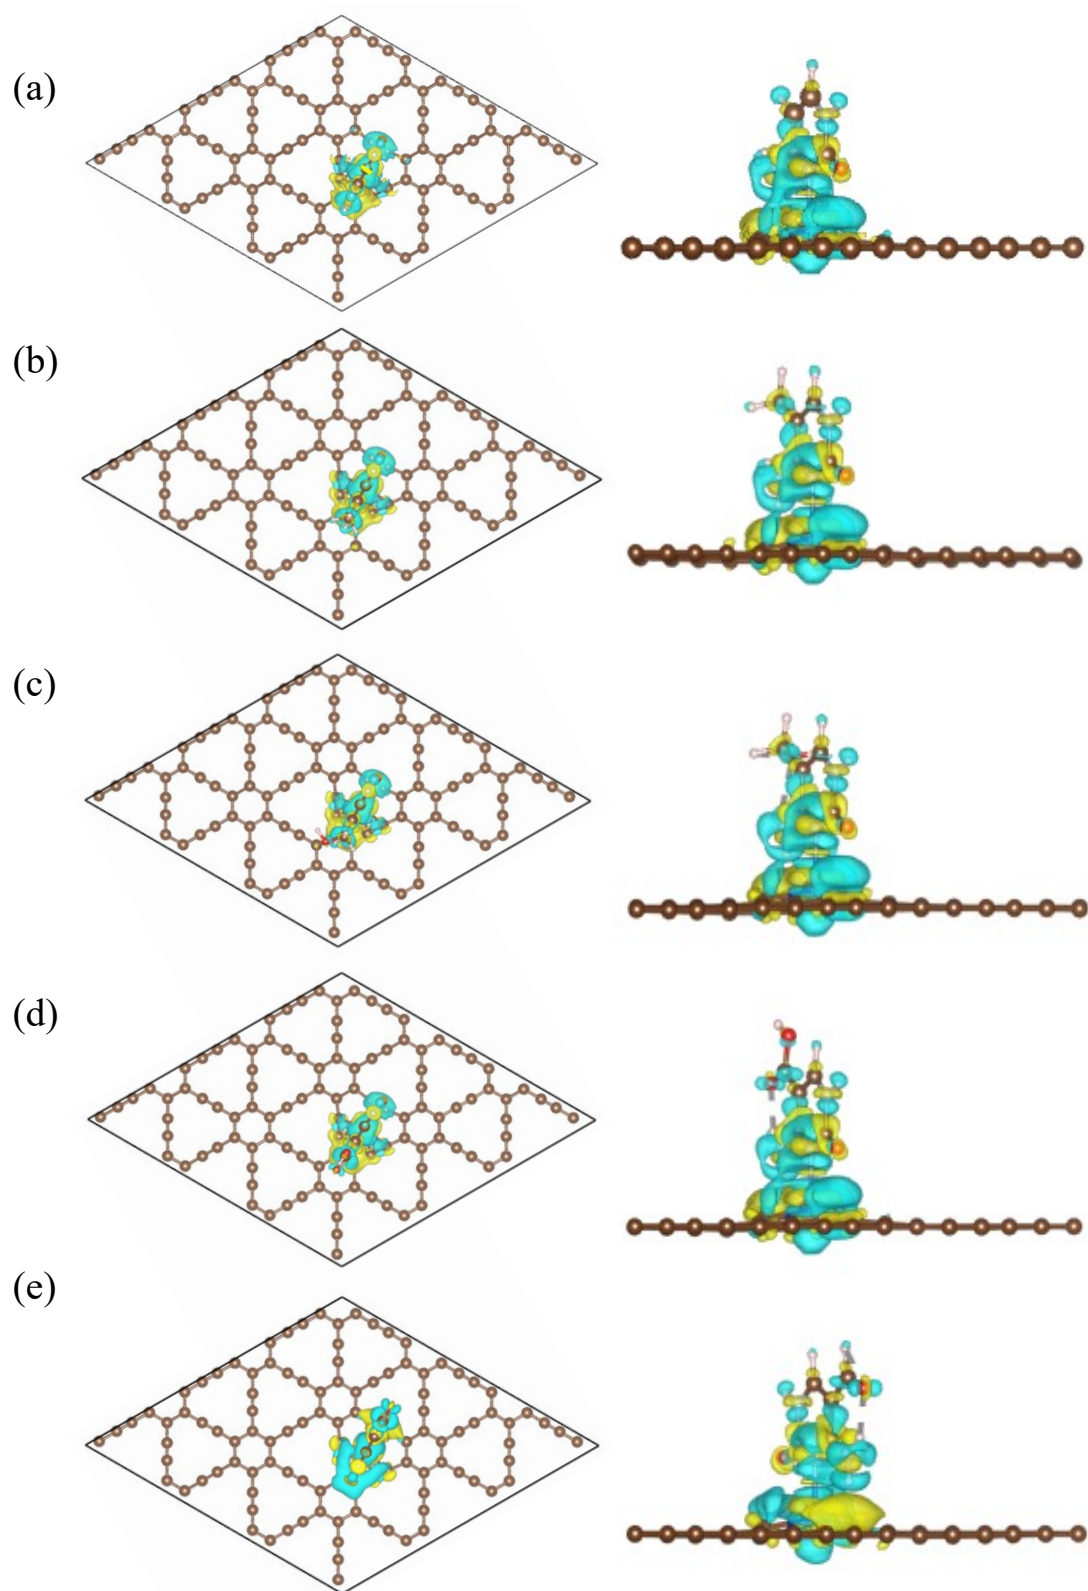

**Fig. S14** The CDD of (a) Cyt-Co-GY, (b) 5-meCyt-Co-GY(c) 5-hmCyt-Co-GY, (d) 5-caCyt-Co-GY, (e) 5-fCyt-Co-GY (top and side view). The yellow and blue are the charge accumulation and depletion, respectively.

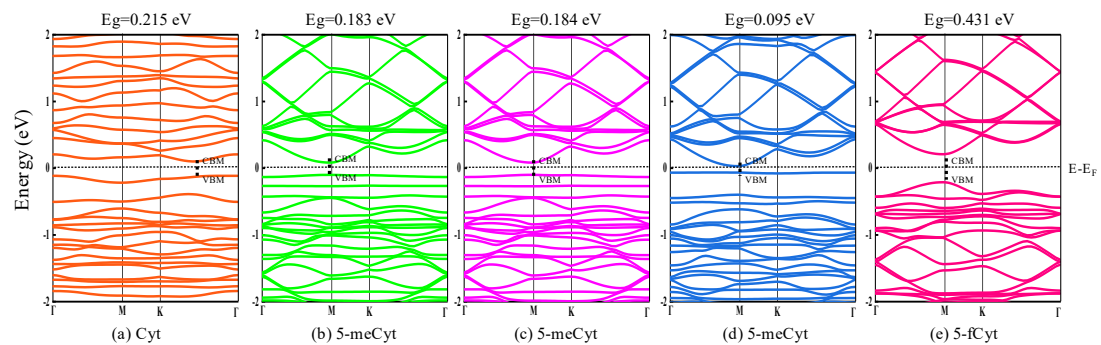

**Fig. S15** Band structure of (a) Cyt, (b) 5-meCyt, (c) 5-hmCyt, (d) 5-caCyt and (e) 5-fCyt absorbed on Ni-GY nanosheets (  $0.2 \text{ V/\AA}$  electric fields ). The Fermi level is set to zero.
